# Supplementary material
Source: publisher site journal article supplement (https://www.degruyterbrill.com/publication/journal_key/NPF/downloadAsset/NPF_Instructions_for_Authors.pdf)
Supplement: Supplementary file 1 [file NPF_Instructions_for_Authors.pdf]

# Nonprofit Policy Forum: Information for Authors

## I. Editorial policy

### Unpublished material

Submission of a manuscript to the Nonprofit Policy Forum implies that the work described is not copyrighted, published, or submitted elsewhere, except in abstract form. The corresponding author should ensure that all co-authors approve the manuscript before its submission.

### Ethical conduct of research

The authors must describe and confirm the safeguards put in place to meet ethical standards where applicable.

### Conflict of interest

When authors submit a manuscript, they are responsible for recognizing and disclosing financial and/or other conflicts of interest that might bias their work and/or could inappropriately influence their judgment. If no acknowledgement is given, the Publishers assume that no such conflict of interest exists.

## II. Submission of manuscripts

Manuscripts should be submitted online at:

<https://mc.manuscriptcentral.com/dgnpf>

## III. Preparation of manuscripts

When you submit your work, please ensure the following:

- The manuscript is complete and uploaded correctly
- The anonymised manuscript contains no information about the authors

### Language

All manuscripts must be written in clear and concise English. If you have reasons to doubt your proficiency with respect to spelling, grammar, etc. (e.g., because English is not your native language), then you may wish to employ—at your expense—the services of a professional language editor.

### General format and length

Manuscripts should be submitted as DOCX (Word), RTF, or LaTeX files. Manuscripts submitted in LaTeX format should also include a PDF export of the document as a reference file. If possible, authors should provide large and/or complicated tables as supplementary material or an appendix. Tables cannot contain lists and should not contain images or dashed lines. All figures and tables should be cited in the text and should have a caption/legend.

A short template can be found at

[https://www.degruyter.com/fileasset/craft/media/doc/authors/DG\\_LaTeX-Template.zip](https://www.degruyter.com/fileasset/craft/media/doc/authors/DG_LaTeX-Template.zip)

### Cover letter

Each manuscript should be accompanied by a cover letter briefly highlighting the main features of the contribution.

### Articles

Review articles aim to summarize recent significant advances in research. Authors should strive for brevity and clarity. The final structure of the review will depend on the focus, but wherever possible the following sections should be included: Title page, abstract, keywords, list of abbreviations, and an introduction; further, body of review, expert opinion, outlook,

highlights, and references. A nomenclature list at the end of the paper is recommended when many symbols are included in the text.

### References

Please use the Chicago Manual of Style author-date system for parenthetical citation in text and the related reference list entry. For more specific details please visit [http://www.chicagomanualofstyle.org/tools\\_citationguide.html](http://www.chicagomanualofstyle.org/tools_citationguide.html) and click on the Author-Date tab.

### CMS (Author-Date) Reference Style

| In-text citation                                                 |                                                                                                                                                                                                                                                                                |                                                                                      |
|------------------------------------------------------------------|--------------------------------------------------------------------------------------------------------------------------------------------------------------------------------------------------------------------------------------------------------------------------------|--------------------------------------------------------------------------------------|
|                                                                  | Direct citation                                                                                                                                                                                                                                                                | Indirect citation                                                                    |
| Single author                                                    | O'Quigley (2000)                                                                                                                                                                                                                                                               | (O'Quigley 2000)                                                                     |
| Two authors                                                      | Greenland and Maldonado (1994)                                                                                                                                                                                                                                                 | (Greenland and Maldonado 1994)                                                       |
| Three authors                                                    | Robins, Breslow, and Greenland (1986)                                                                                                                                                                                                                                          | (Robins, Breslow, and Greenland 1986)                                                |
| More than three authors                                          | Mantel et al. (1977)                                                                                                                                                                                                                                                           | (Mantel et al. 1977)                                                                 |
| Series of references                                             | Yanagimoto (1990), Sato (1990), and Fujii and Yanagimoto (2005)                                                                                                                                                                                                                | <b>Alphabetical order</b><br>(Fujii and Yanagimoto 2005; Sato 1990; Yanagimoto 1990) |
| Same author group with different years                           | Smith et al. (1985, 1986)                                                                                                                                                                                                                                                      | (Smith et al., 1985, 1986)                                                           |
| Same author group with same year                                 | Lawrence and David (2009a, 2009b)                                                                                                                                                                                                                                              | (Lawrence and David 2009a, 2009b)                                                    |
| Author (with same surname and different initials) with same year | T.H.E. Smith et al. (2003) and A. Smith et al. (2003)                                                                                                                                                                                                                          | <b>Alphabetical order</b><br>(A. Smith et al. 2003; T.H.E. Smith et al. 2003)        |
| Reference lists                                                  |                                                                                                                                                                                                                                                                                |                                                                                      |
| Reference type                                                   | Example                                                                                                                                                                                                                                                                        |                                                                                      |
| Reference list order                                             | Alphabetical order                                                                                                                                                                                                                                                             |                                                                                      |
| 1. Journal                                                       | Kamtekar, R. 2016. "The Soul's (After-) Life." <i>Ancient Philosophy</i> 36 (6): 115-32.                                                                                                                                                                                       |                                                                                      |
| 2. Journal with supplement                                       | Yuan, M., and H. Liu. 2011. "The Economic Consequences of Fair Value Accounting." <i>Accounting, Economics, and Law</i> 1 (Suppl. 2): 1-42.                                                                                                                                    |                                                                                      |
| 3. Collaboration                                                 | WHO. 2016. "Vitamin K for Newborns." <i>Journal of Midwifery &amp; Women's Health</i> 61 (5): 675-6.                                                                                                                                                                           |                                                                                      |
| 4. et al. usage (not allowed - all the authors are included)     | Wolchik, S. A., S. G. West, I. N. Sandler, J. Tein, D. Coatsworth, L. Lengua, and W. A. Griffin. 2000. "An Experimental Evaluation of Theory-Based Mother and Mother-Child Programs for Children of Divorce." <i>Journal of Consulting and Clinical Psychology</i> 68: 843-56. |                                                                                      |

|                                                |                                                                                                                                                                                                                                                                                                       |
|------------------------------------------------|-------------------------------------------------------------------------------------------------------------------------------------------------------------------------------------------------------------------------------------------------------------------------------------------------------|
| 5. Epub ahead of print (DOI)                   | Von Ledebur, S. C. 2007. "Optimizing Knowledge Transfer by New Employees in Companies." Knowledge Management Research & Practice, doi: 10.1057/palgrave.kmrp.8500141 (Epub ahead of print).                                                                                                           |
| 6. Reference – forthcoming                     | Choi, S., D. Furceri, Y. Huang, and P. Loungani. 2017. "Aggregate Uncertainty and Sectoral Productivity Growth: The Role of Credit Constraints." Journal of International Money and Finance (forthcoming).                                                                                            |
| 7. Book/monograph                              | Reeve, C. D. C. 1989. Socrates in the Apology. Indianapolis: Hackett Publishing.                                                                                                                                                                                                                      |
| 8. Book with edition                           | Scherer, F., and D. Ross. 1990. Industrial Market Structure and Economic Performance, 3rd ed. Boston: Houghton Mifflin.                                                                                                                                                                               |
| 9. Edited book                                 | Parker, R. H., and G. C. Harcourt, eds. (1969). Readings in the Concept and Measurement of Income. London, U.K.: Cambridge University Press.                                                                                                                                                          |
| 10. Edited book with chapter title and editors | Annas, Julia. 2015. "Plato's Defense of Justice: The Wrong Kind of Reason?." In The Quest for the Good Life: Ancient Philosophers on Happiness, edited by E. K. Øyvind Rabbås, H.F. Emilsson, and M. Tuominen, 275–94. Oxford: Oxford University Press.                                               |
| 11. Edited book series                         | Stole, L. 2007. "Price Discrimination and Competition." In Handbook of Industrial Organization, Vol. 3, edited by M. Armstrong, and R. H. Porter, 2221–99. Amsterdam, The Netherlands: Elsevier Science Publishers B.V.                                                                               |
| 12. Proceedings/Conferences                    | Herculano-Houzel, S., Collins, C. E., Wong, P., Kaas, J. H., and Lent, R. 2008. "The Basic Nonuniformity of the Cerebral Cortex." In Proceedings of the Seventh International Conference on Enterprise Information Systems, Miami, FL, 97–108. Berlin: Germany: Springer-Verlag.                      |
| 13. Electronic publication (Also available at) | Rampersad, T. 2005. Traditional Knowledge and Traditional Cultural Expressions. Also available at <a href="http://www.wipo.int/roller/comments/ipisforum/Weblog/theme_eight_how_can_cultural#comments">http://www.wipo.int/roller/comments/ipisforum/Weblog/theme_eight_how_can_cultural#comments</a> |
| 14. Electronic publication (accessed)          | Doe, J. 1999. The Dictionary of Substances and Their Effects. United Kingdom: Royal Society of Chemistry. <a href="http://www.rsc.org/dose/title of subordinate document">http://www.rsc.org/dose/title of subordinate document</a> (accessed January 15, 1999).                                      |
| 15. Thesis/Dissertation                        | Rahman, M. 2013. "Using Authentic Materials in the Writing Classes: Tertiary Level Scenario." PhD diss., BRAC University.                                                                                                                                                                             |
| 16. Report                                     | U.S. Federal Energy Regulatory Commission. 1977. Annual Report of the U.S. Federal Energy Regulatory Commission. Washington, D.C.: GPO.                                                                                                                                                               |
| 17. Patent                                     | Christensen G. K., inventor; 1971 Aug. 10. "Toy Building Set." United States patent US 3,597,875.                                                                                                                                                                                                     |
| 18. Standards                                  | Standards Australia. 1989. Electrical Equipment for Coal Mines – Insulating Materials – Materials for Insulating Power Conducting Components (AS 1147.1-1989).                                                                                                                                        |

### Mathematics and equations

- Roman letters used in mathematical expressions as variables must be italicized. Roman letters used as part of multi-letter function names should not be italicized. Subscripts and superscripts must be a smaller font size than the main text
- Type short mathematical expressions inline

- Longer expressions must appear as display math, as must expressions using many different levels (e.g., such as fractions)
- Ensure that Equations are typed or created with a plug-in, such as Word Formula Editor or MathType. Mathematical expressions must not be displayed as images
- Important definitions or concepts can also be set off as display math
- Number your equations sequentially
- Insert a blank line before and after each equation
- Whether equation numbers are on the right or left is the choice of the author(s). However, make sure to be consistent in this
- When proofing your document, pay particular attention to the rendering of the mathematics, especially symbols and notation drawn from other-than-standard fonts

### Fonts

- Only use Unicode fonts (e.g. Times New Roman, Arial)

### Colored text

- Set the font color to black for the majority of the text. De Gruyter encourages authors to take advantage of the ability to use color in the production of figures, maps, images, and graphs. However, you need to appreciate that this will cause some of your readers problems when they print the document on a black and white printer. For this reason, you are advised to avoid the use of colors in situations where their translation to black and white would render the material illegible or incomprehensible.

### Emphasized text, titles, and foreign terms

- To indicate text you wish to emphasize, use italics rather than underlining. The use of color to emphasize text is discouraged.
- Foreign terms should be set in italics rather than underlined. • Titles of books, movies, etc., should be set in italics rather than underlined.

### Abbreviations

The use of abbreviations and acronyms is permitted provided they are defined the first time they are used.

### Headings

Headings (e.g., title of sections) should be distinguished from the main body text:

- Clearly indicate the heading hierarchy.
- Be consistent in whether or not you use headline case, or you capitalize the first word and leave the rest in lower-case.

### Tables

Submit tables on separate pages or as separate files and number them consecutively using Arabic numerals. Provide a short descriptive title, column headings, and (if necessary) footnotes to make each table self-explanatory. Refer to tables in the text as Table 1, etc. Use Table 1, etc. in the tablelegends. Especially large or complex Tables should be supplied as Supplementary Material or as an Appendix.

### Figures

**Graphical abstract figure and text for the table of contents (optional):** A graphical abstract figure (minimum resolution of 300 dpi) and a graphical abstract text (consisting of the article title, all author names without affiliations, and a one sentence summary of the manuscript, followed by 3–5 keywords) for the table of contents may be provided. These elements are meant to provide the reader a summary of the research reviewed in the paper.

**General requirements:** All illustrations must be of reproduction-ready quality. They will be reduced in size to fit, whenever possible, the width of a single column. Lettering of all figures within the article should be uniform in style (preferably a sans serif typeface like Helvetica) and of sufficient size (ca. 8 pt.). Uppercase letters A, B, C, etc. should be used to identify parts of multi-part figures. Cite all figures in the text in numerical order. Indicate the

approximate placement of each figure within the manuscript text. Do not embed figures within the text body of the manuscript; submit figures as separate files.

**Halftone figures (grayscale and color)** should have a **minimum resolution of 300 dpi and be of good contrast; recommended file format: tif**. Authors are encouraged to submit illustrations in color if necessary for conveying their scientific content. Publication of color figures is provided free of charge.

**Line drawings** must be of reproduction-ready quality. Please note that faint shading may be lost upon reproduction. When drawing bar graphs, use patterning instead of grayscales. Lettering of all figures should be uniform in style. **A resolution of 1200 dpi is recommended; recommended file format: tif**.

**Figure captions:** Provide a short descriptive title and a legend to make each figure self-explanatory, if necessary. Explain all symbols used in the figures. Remember to use the same abbreviations as in the text body. Captions for all figures should be included and clearly marked at the end of the manuscript.

#### **Permissions**

It is the authors' responsibility to obtain permission to reproduce original or modified material that has been previously published. Copyright permissions can be obtained through the Copyright Clearance Center ([www.copyright.com](http://www.copyright.com)).

## **IV. Proofs, offprints, NIH funded research**

#### **Proof for correction**

Authors of accepted papers will be able to proofread their article in our Online Proofing System before publication. At the proof stage, only minor changes, other than corrections of typesetter errors, are allowed.

#### **Offprints**

The electronic files of typeset articles in Adobe Acrobat PDF format are provided free of charge; corresponding authors receive notification that their article has been published online.

#### **Note for authors of NIH-funded research**

De Gruyter acknowledges that the author of a US-agency-funded article retains the right to provide a copy of the final manuscript to that agency upon acceptance for publication or thereafter, for public archiving in PubMed Central 12 months after publication in the journal. Note that only the accepted version of the manuscript, not the PDF file of the published article, may be used for NIH archiving.

#### **Please contact the Editorial Office for any further questions:**

Katharina Appelt

Tel. +49-30-26005-325

E-mail: [Katharina.Appelt@degruyter.com](mailto:Katharina.Appelt@degruyter.com)
